# Supplementary material for: The Synergistic Action of Metformin and Glycyrrhiza uralensis Fischer Extract Alleviates Metabolic Disorders in Mice with Diet-Induced Obesity
Source: MDPI journal article supplement (doi:10.3390/ijms24020936), 2023-01-04
Supplement: s1 [file s1]

# The synergistic action of metformin and *Glycyrrhiza uralensis* Fischer extract alleviates metabolic disorders in mice with diet-induced obesity

Min-Kyeong Hong <sup>1,2,3,#</sup>, Youngji Han <sup>1,2,3,#</sup>, Hae-Jin Park <sup>4,#</sup>, Mi-Rae Shin <sup>5</sup>, Seong-Soo Roh <sup>5,\*</sup> and Eun-Young Kwon <sup>1,2,3,\*</sup>

<sup>1</sup> Department of Food Science and Nutrition, Kyungpook National University, 1370 San-Kyuk Dong Puk-Ku, 41566 Daegu, Republic of Korea

<sup>2</sup> Center for Food and Nutritional Genomics Research, Kyungpook National University, 1370 San-Kyuk Dong Puk-Ku, 41566 Daegu, Republic of Korea

<sup>3</sup> Center for Beautiful Aging, Kyungpook National University, 1370 San-Kyuk Dong Puk-Ku, 41566 Daegu, Republic of Korea

<sup>4</sup> Bio Convergence Testing Center, Daegu Haany University, 1 Haanydaero, Gyeongsangsi, Gyeongsangbuk-Do, 38610 Daegu, Republic of Korea

<sup>5</sup> Department of Herbology, College of Korean Medicine, Daegu Haany University, 64 Gil, 25 Suseongro, Suseong-gu, 42158 Daegu, Republic of Korea

<sup>#</sup> These authors contributed equally to this work.

<sup>\*</sup> Correspondence: Seong-Soo Roh, Ph.D. and Eun-Young Kwon, Ph.D.

Roh SS; Tel: +82-53-770-2258, Fax: +82-53-950-6229, E-mail: ddede@dhua.ac.kr

Kwon EY; Tel: +82-53-950-6231, Fax: +82-53-950-6229, E-mail: eykwon@knu.ac.kr

## Supplementary Material

**Table S1.** Diet composition for animal experiment I.

| <b>Ingredient(g)</b>      | <b>ND<br/>(AIN-93G)</b> | <b>HFD<br/>(60 kcal% fat)</b> | <b>LGU<br/>(0.015%)</b> | <b>HGU<br/>(0.03%)</b> |
|---------------------------|-------------------------|-------------------------------|-------------------------|------------------------|
| <b>Casein</b>             | 200                     | 267                           | 267                     | 267                    |
| <b>Corn starch</b>        | 397.486                 | 63.381                        | 63.381                  | 63.381                 |
| <b>Sucrose</b>            | 100                     | 0                             | 0                       | 0                      |
| <b>Dextrose</b>           | 132                     | 176                           | 176                     | 176                    |
| <b>Cellulose</b>          | 50                      | 67                            | 67                      | 67                     |
| <b>Soybean Oil</b>        | 70                      | 33                            | 33                      | 33                     |
| <b>Lard</b>               | 0                       | 327                           | 327                     | 327                    |
| <b>Mineral mixture</b>    | 35                      | 47                            | 47                      | 47                     |
| <b>Vitamin mixture</b>    | 10                      | 13                            | 13                      | 13                     |
| <b>TBHQ, antioxidant</b>  | 0.014                   | 0.019                         | 0.019                   | 0.019                  |
| <b>L-cystine</b>          | 3                       | 4                             | 4                       | 4                      |
| <b>Choline Bitartrate</b> | 2.5                     | 3                             | 3                       | 3                      |
| <b>GU</b>                 | -                       | -                             | 0.15                    | 0.3                    |
| <b>Total (g)</b>          | <b>1000.00</b>          | <b>1000.00</b>                | <b>1000.15</b>          | <b>1000.3</b>          |
| <b>Calorie (kcal/g)</b>   | <b>4000</b>             | <b>5332.62</b>                | <b>5332.62</b>          | <b>5332.62</b>         |

<sup>1</sup>AIN-93 mineral mixture (g/kg): calcium carbonate anhydrous, 357; potassium phosphate monobasic, 196; potassium citrate tripotassium monohydrate, 70.78; sodium chloride, 74; potassium sulfate, 46.60; magnesium oxide, 24; ferric citrate, 6.06; zinc carbonate, 1.65; sodium meta-silicate·9H<sub>2</sub>O, 1.45; manganous carbonate, 0.63; cupric carbonate, 0.30; chromium potassium sulfate·12H<sub>2</sub>O, 0.275; boric acid, 0.0815; sodium fluoride, 0.635; nickel carbonate, 0.0318, lithium chloride, 0.0174, sodium selenite anhydrous, 0.01025; potassium iodate, 0.010; ammonium paramolybdate·4H<sub>2</sub>O, 0.00795; ammonium vanadate 0.0066; powdered sucrose, 221.026 <sup>2</sup>AIN-93G- Vitamin Mixture (g/kg): nicotinic acid, 3; Ca

pantothenate, 1.6; pyridoxine-HCl, 0.7; thiamin-HCl, 0.6; riboflavin, 0.6; folic acid, 0.2; biotin, 0.02; vitamin B-12 (cyanocobalamin), 2.5; vitamin E (all-rac- $\alpha$ -tocopheryl acetate), 15; vitamin A (all-trans-retinyl palmitate), 0.8; vitamin D-3 (cholecalciferol), 0.25; vitamin K-1 (phylloquinone), 0.075; powdered sucrose, 974.655. ND, Normal diet (AIN-93G 16 Kcal% fat); HFD, High fat diet (60 Kcal% fat); LGU, HFD + 0.015% *Glycyrrhiza uralensis* Fischer 0.015%; HGU, HFD + 0.003% *Glycyrrhiza uralensis* Fischer 0.015%;

**Table S2.** Diet composition for animal experiment II.

| <b>Ingredient(g)</b>               | <b>ND</b> | <b>HFD</b> | <b>HFDM</b> | <b>GU</b> | <b>GUM</b> |
|------------------------------------|-----------|------------|-------------|-----------|------------|
| <b>Casein</b>                      | 200       | 267        | 267         | 267       | 267        |
| <b>Corn starch</b>                 | 397.486   | 63.381     | 63.381      | 63.381    | 63.381     |
| <b>Sucrose</b>                     | 100       | 0          | 0           | 0         | 0          |
| <b>Dextrose</b>                    | 132       | 176        | 176         | 176       | 176        |
| <b>Cellulose</b>                   | 50        | 67         | 67          | 67        | 67         |
| <b>Soybean Oil</b>                 | 70        | 33         | 33          | 33        | 33         |
| <b>Lard</b>                        | 0         | 327        | 327         | 327       | 327        |
| <b>Mineral mixture<sup>1</sup></b> | 35        | 47         | 47          | 47        | 47         |
| <b>Vitamin mixture<sup>2</sup></b> | 10        | 13         | 13          | 13        | 13         |
| <b>TBHQ, antioxidant</b>           | 0.014     | 0.019      | 0.019       | 0.019     | 0.019      |
| <b>L-cystine</b>                   | 3         | 4          | 4           | 4         | 4          |
| <b>Choline Bitartrate</b>          | 2.5       | 3          | 3           | 3         | 3          |
| <b>Metformin</b>                   | -         | -          | 0.5         | -         | 0.5        |
| <b>GU</b>                          | -         | -          | -           | 0.15      | 0.15       |
| <b>Total (g)</b>                   | 1000.00   | 1000.00    | 1000.50     | 1000.15   | 1000.65    |
| <b>Calorie (kcal/g)</b>            | 4000      | 5332.62    | 5332.62     | 5332.62   | 5332.62    |

<sup>1</sup>AIN-93 mineral mixture (g/kg): calcium carbonate anhydrous, 357; potassium phosphate monobasic, 196; potassium citrate tripotassium monohydrate, 70.78; sodium chloride, 74; potassium sulfate, 46.60; magnesium oxide, 24; ferric citrate, 6.06; zinc carbonate, 1.65; sodium meta-silicate·9H<sub>2</sub>O, 1.45;

manganous carbonate, 0.63; cupric carbonate, 0.30; chromium potassium sulfate·12H<sub>2</sub>O, 0.275; boric acid, 0.0815; sodium fluoride, 0.635; nickel carbonate, 0.0318, lithium chloride, 0.0174, sodium selenite anhydrous, 0.01025; potassium iodate, 0.010; ammonium paramolybdate·4H<sub>2</sub>O, 0.00795; ammonium vanadate 0.0066; powdered sucrose, 221.026 <sup>2</sup>AIN-93G- Vitamin Mixture (g/kg): nicotinic acid, 3; Ca pantothenate, 1.6; pyridoxine-HCl, 0.7; thiamin-HCl, 0.6; riboflavin, 0.6; folic acid, 0.2; biotin, 0.02; vitamin B-12 (cyanocobalamin), 2.5; vitamin E (all-rac- $\alpha$ -tocopheryl acetate), 15; vitamin A (all-trans-retinyl palmitate), 0.8; vitamin D-3 (cholecalciferol), 0.25; vitamin K-1 (phylloquinone), 0.075; powdered sucrose, 974.655. ND, Normal diet (AIN-93G 16 Kcal% fat); HFD, High fat diet (60 Kcal% fat); HFD<sub>M</sub>, HFD + 50mg/kg Metformin; GU, HFD + 0.015% Glycyrrhiza uralensis Fischer 0.015%; GUM, HFD + 0.015% Glycyrrhiza uralensis Fischer +50mg/kg Metformin.
